# Supplementary material for: A PRISMA-compliant meta-analysis of MDM4 genetic variants and cancer susceptibility
Source: PubMed Central journal article supplement (PMC5342025; doi:10.18632/oncotarget.12558), 2016-10-11
Supplement: oncotarget-07-73935-s001.pdf [file oncotarget-07-73935-s001.pdf]

## A PRISMA-compliant meta-analysis of MDM4 genetic variants and cancer susceptibility

### Supplementary Materials

#### SUPPLEMENTARY METHODS: SEARCH CRITERION

##### 1. PubMed Search String (MeSH Search)

(1) Polymorphism, Genetic [Mesh]; (2) Polymorphism, Single Nucleotide [Mesh]; (3) Genotype [Mesh]; (4) Mutation [Mesh]; (5) Alleles [Mesh]; (6) Genetic Variation [Mesh]; (7) 1 OR 2 OR 3 OR 4 OR 5 OR 6; (8) MDM4 protein, human [Supplementary Concept]; (9) Neoplasms [Mesh]; (10) Carcinoma [Mesh]; (11) 9 OR 10; (12) 7 AND 8 AND 11

##### 2. PubMed Search String (Text Word Search)

(1) polymorphism; (2) single nucleotide polymorphism; (3) genotype; (4) mutation; (5) alleles; (6) variation; (7) 1 OR 2 OR 3 OR 4 OR 5 OR 6; (8) MDM4; (9) cancer; (10) tumor; (11) malignancy; (12) carcinoma;

(13) neoplasm; (14) 9 OR 10 OR 11 OR 12 OR 13; (15) 7 AND 8 AND 14

##### 3. Embase Search String (Emtree Search)

(1) 'protein mdmx'/exp; (2) 'genetic polymorphism'/exp; (3) 'single nucleotide polymorphism'/exp; (4) 'genotype phenotype correlation'/exp; (5) 'mutation'/exp; (6) 'allele'/exp; (7) 'genetic variability'/exp; (8) 2 OR 3 OR 4 OR 5 OR 6 OR 7; (9) 'neoplasm'/exp; (10) 'carcinoma'/exp; (11) 9 OR 10; (12) 1 AND 8 AND 11

##### 4. Embase Search String (Quick Search)

(1) polymorphism; (2) single nucleotide polymorphism; (3) genotype; (4) mutation; (5) alleles; (6) variation; (7) 1 OR 2 OR 3 OR 4 OR 5 OR 6; (8) MDM4; (9) cancer; (10) tumor; (11) malignancy; (12) carcinoma; (13) neoplasm; (14) 9 OR 10 OR 11 OR 12 OR 13; (15) 7 AND 8 AND 14.

**Supplementary Table S1: PRISMA 2009 Checklist For this meta-analysis.** See Supplementary\_Table\_S1

**Supplementary Table S2: The genotype data of included studies**

| SNP            | Number of Genotype (Case) |               |             | Number of Genotype (Control) |               |             | Data source        |
|----------------|---------------------------|---------------|-------------|------------------------------|---------------|-------------|--------------------|
|                | Wild type                 | Hetero-zygote | Homo-zygote | Wild type                    | Hetero-zygote | Homo-zygote |                    |
| rs4245739 A/C  | 86                        | 61            | 7           | 88                           | 56            | 9           | Wynendaele 2010    |
|                | 3318                      | 2637          | 557         | 22825                        | 15798         | 2828        | Garcia 2013        |
|                | 733                       | 67            | 0           | 686                          | 111           | 3           | Liu (Jinan) 2013   |
|                | 278                       | 22            | 0           | 501                          | 96            | 3           | Liu (Huaian) 2013  |
|                | 501                       | 37            | 2           | 478                          | 70            | 2           | Zhou (Jinan) 2013  |
|                | 529                       | 56            | 3           | 510                          | 88            | 2           | Zhou (Huaian) 2013 |
|                | 187                       | 13            | 0           | 346                          | 53            | 1           | Fan 2014           |
|                | 208                       | 209           | 51          | 210                          | 219           | 64          | Feng 2014          |
|                | 966                       | 643           | 108         | 1021                         | 703           | 146         | Gansmo 2015        |
|                | 823                       | 600           | 108         | 2042                         | 1439          | 266         | Gansmo 2015        |
|                | 715                       | 515           | 101         | 2042                         | 1439          | 266         | Gansmo 2015        |
|                | 1412                      | 927           | 161         | 1021                         | 763           | 120         | Gansmo 2015        |
|                | 297                       | 22            | 1           | 548                          | 90            | 2           | Gao (Jinan) 2015   |
|                | 183                       | 17            | 0           | 321                          | 77            | 2           | Gao (Huaian) 2015  |
|                | rs11801299 G/A            | 716           | 564         | 105                          | 1021          | 703         | 146                |
| 757            |                           | 541           | 106         | 1021                         | 703           | 146         | Gansmo 2016        |
| 684            |                           | 351           | 40          | 665                          | 376           | 38          | Yu 2011            |
| 118            |                           | 179           | 74          | 202                          | 109           | 10          | Yu 2012            |
| rs1380576 C/G  | 487                       | 477           | 111         | 518                          | 455           | 106         | Yu 2011            |
|                | 170                       | 158           | 43          | 150                          | 135           | 36          | Yu 2012            |
| rs10900598 G/T | 188                       | 281           | 173         | 212                          | 290           | 218         | Wu 2015            |
|                | 307                       | 545           | 223         | 296                          | 552           | 231         | Yu 2011            |
|                | 233                       | 126           | 12          | 93                           | 156           | 72          | Yu 2012            |
| rs1563828 C/T  | 53                        | 57            | 14          | 44                           | 43            | 14          | Song 2012          |
|                | 98                        | 91            | 21          | 90                           | 88            | 22          | Zhang 2012         |
|                | 27                        | 21            | 2           | 389                          | 340           | 70          | Gansmo 2015        |

**Supplementary Table S3: The result of sensitivity analysis for various genotype models. See Supplementary\_Table\_S3**

**Supplementary Table S4: Score of quality assessment**

| Criteria                                          | Score |
|---------------------------------------------------|-------|
| Representativeness of cases                       |       |
| Selected from population cancer registry          | 2     |
| Selected from hospital                            | 1     |
| Not described                                     | 0     |
| Source of controls                                |       |
| Population-based                                  | 2     |
| Hospital-based                                    | 1     |
| Not described                                     | 0     |
| Ascertainment of cancer cases                     |       |
| Histopathologic confirmation                      | 2     |
| Patient medical records                           | 1     |
| Not described                                     | 0     |
| Control selection                                 |       |
| Controls matched with cases by age and sex        | 2     |
| Controls matched with cases only by age or by sex | 1     |
| Not matched or not described                      | 0     |
| Genotyping examination                            |       |
| Genotyping done blindly and quality control       | 2     |
| Only genotyping done blindly or quality control   | 1     |
| Unblinded and without quality control             | 0     |
| Hardy-Weinberg equilibrium in controls            |       |
| Hardy-Weinberg equilibrium                        | 2     |
| Hardy-Weinberg disequilibrium or not described    | 0     |
| Total sample size                                 |       |
| > 1000                                            | 3     |
| 501–1000                                          | 2     |
| 201–500                                           | 1     |
| ≤ 200                                             | 0     |
